# Supplementary material for: Controlling the solid-state and particle properties of a fixed-dose combination co-amorphous system by spray drying
Source: Royal Society of Chemistry journal article supplement (doi:10.1039/d4pm00257a), 2024-11-20
Supplement: d4pm00257a1.pdf [file d4pm00257a1.pdf]

## Supplementary Information

### **Controlling the Solid-State and Particle Properties of a Fixed-Dose Combination Co-Amorphous System by Spray Drying**

*Alice Parkes<sup>1</sup>, Ahmad Ziaee<sup>2</sup>, Emmet O'Reilly<sup>1</sup>*

*<sup>1</sup>Department of Chemical Sciences, SSPC the Science Foundation Ireland Research Centre for Pharmaceuticals, Bernal Institute, University of Limerick, Limerick, Ireland.*

*<sup>2</sup>Cook Medical, Castletroy, Limerick, Ireland.*

## Methods

### Solubility Screening

The following calculation was followed to determine the solubility of both carbamazepine and chlorothiazide in each solvent:

*Mass of the sample jar and wet sample – mass of the sample jar = mass of solution*

*Mass of the sample jar and dry sample – mass of the sample jar = mass of solute*

*Mass of solution – mass of solute = mass of solvent*

$$\frac{\text{Mass of solvent}}{\text{Density of solvent}} = \text{volume of solvent}$$

$$\text{Solubility} = \frac{\text{Mass of solute}}{\text{Volume of solvent}} \text{ (g/ml)}$$

### Design of Experiments

*Table S1 DOE produced by JMP Pro.*

| Run Number | Feed (ml/min) | Atomising gas (L/h) |
|------------|---------------|---------------------|
| 1          | 0.9           | 742                 |
| 2          | 2.1           | 742                 |
| 3          | 1.5           | 536                 |
| 4          | 0.9           | 536                 |
| 5          | 0.9           | 357                 |
| 6          | 1.5           | 742                 |
| 7          | 2.1           | 536                 |
| 8          | 2.1           | 357                 |
| 9          | 1.5           | 357                 |

## Results

### Thermal Analysis

Table S2 Weight loss occurrences in the TGA thermograms for DOE 1-9.

| DOE No. | Weight loss |            |            |
|---------|-------------|------------|------------|
|         | 50 – 150 °C | 150-300 °C | 300-450 °C |
| DOE 1R  | 4.789%      | 48.14%     | 23.41%     |
| DOE 2R  | 5.335%      | 54.85%     | 23.53%     |
| DOE 3R  | 5.119%      | 53.51%     | 23.49%     |
| DOE 4R  | 5.284%      | 51.71%     | 24.43%     |
| DOE 5R  | 5.573%      | 51.14%     | 23.75%     |
| DOE 6R  | 4.893%      | 52.66%     | 24.34%     |
| DOE 7R  | 5.479%      | 53.54%     | 23.52%     |
| DOE 8R  | 5.444%      | 54.60%     | 23.69%     |
| DOE 9R  | 4.870%      | 52.65%     | 23.64%     |

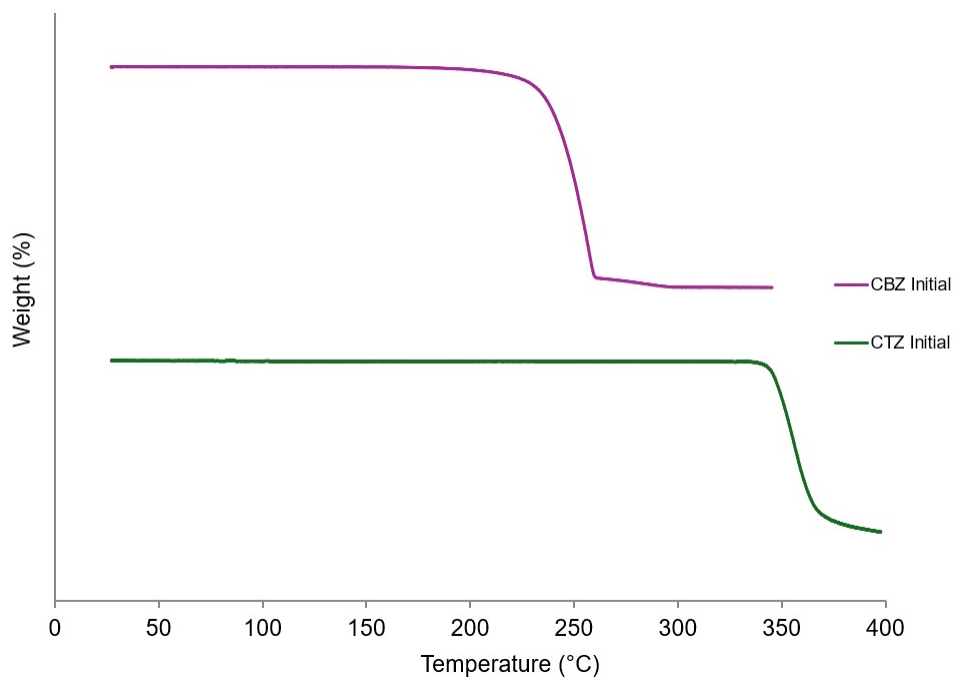

Figure S1 TGA thermograms of CBZ initial and CTZ initial.

### Solid-State Analysis

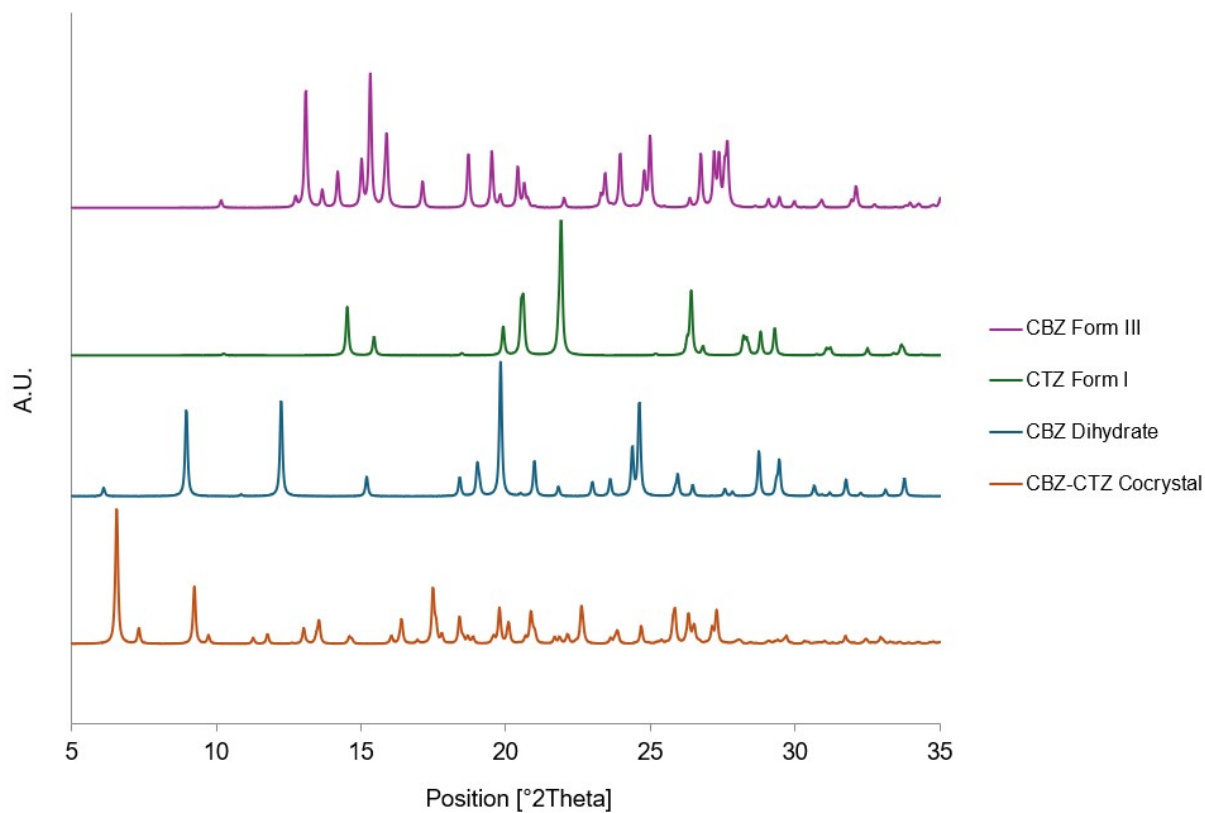

Figure S2 Calculated diffractograms for CBZ Form III (CSD Refcode: CBMZPN10), CTZ form I (CSD Refcode: QQQAUG09), the CBZ dihydrate (CSD Refcode: FEFNOT11) and the CBZ-CTZ cocrystal (CSD Refcode: VEJZUI).
